# Supplementary material for: Performance Analysis of Conventional Machine Learning Algorithms for Identification of Chronic Kidney Disease in Type 1 Diabetes Mellitus Patients
Source: MDPI journal article supplement (doi:10.3390/diagnostics11122267), 2021-12-03
Supplement: s1 [file s1]

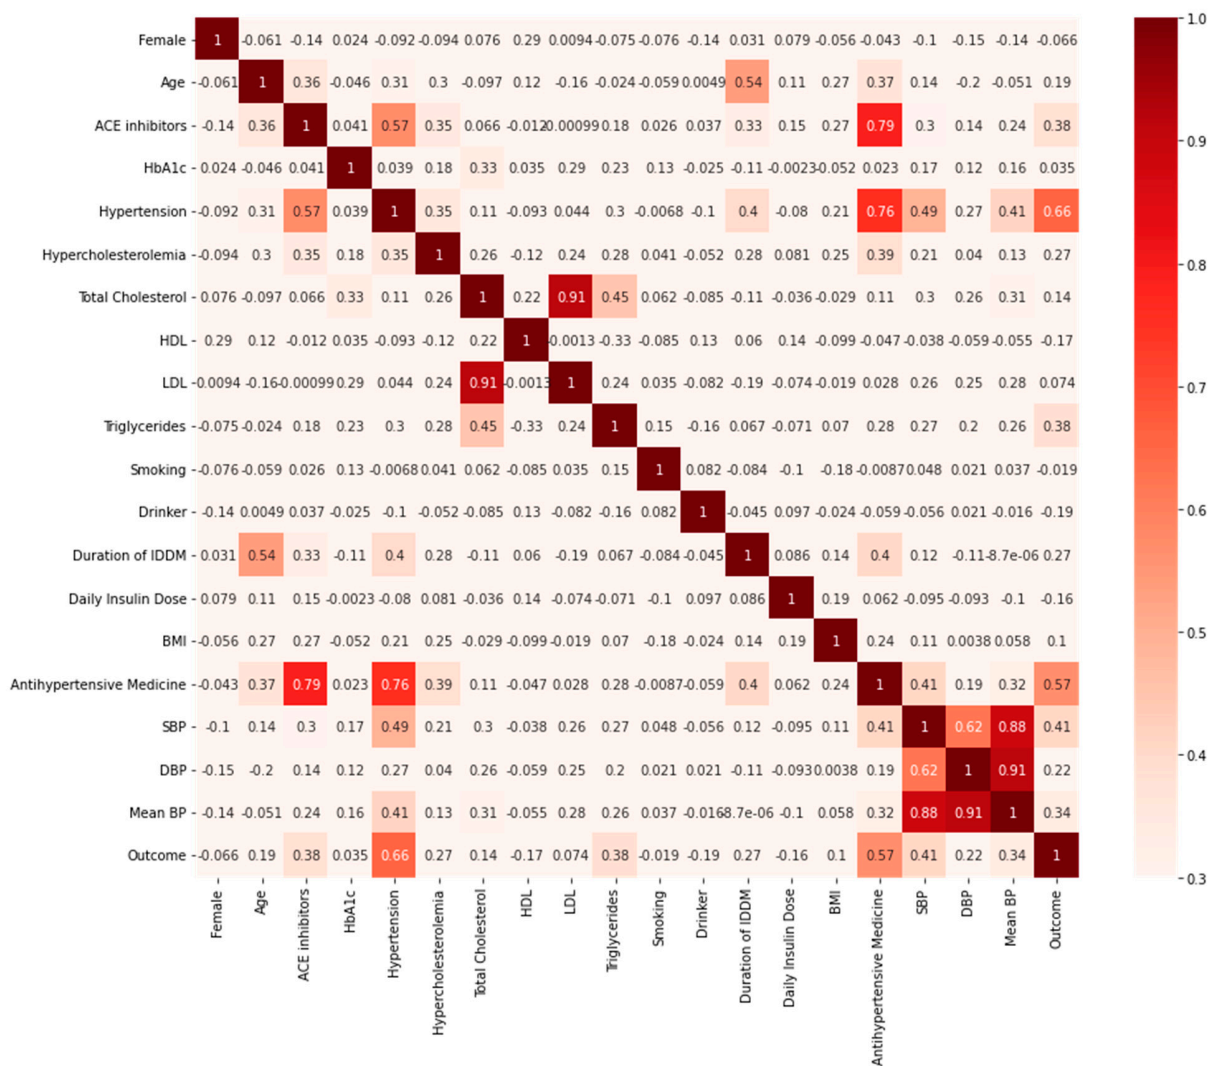

**Figure S1:** Features correlation heatmap of Dataset RF.

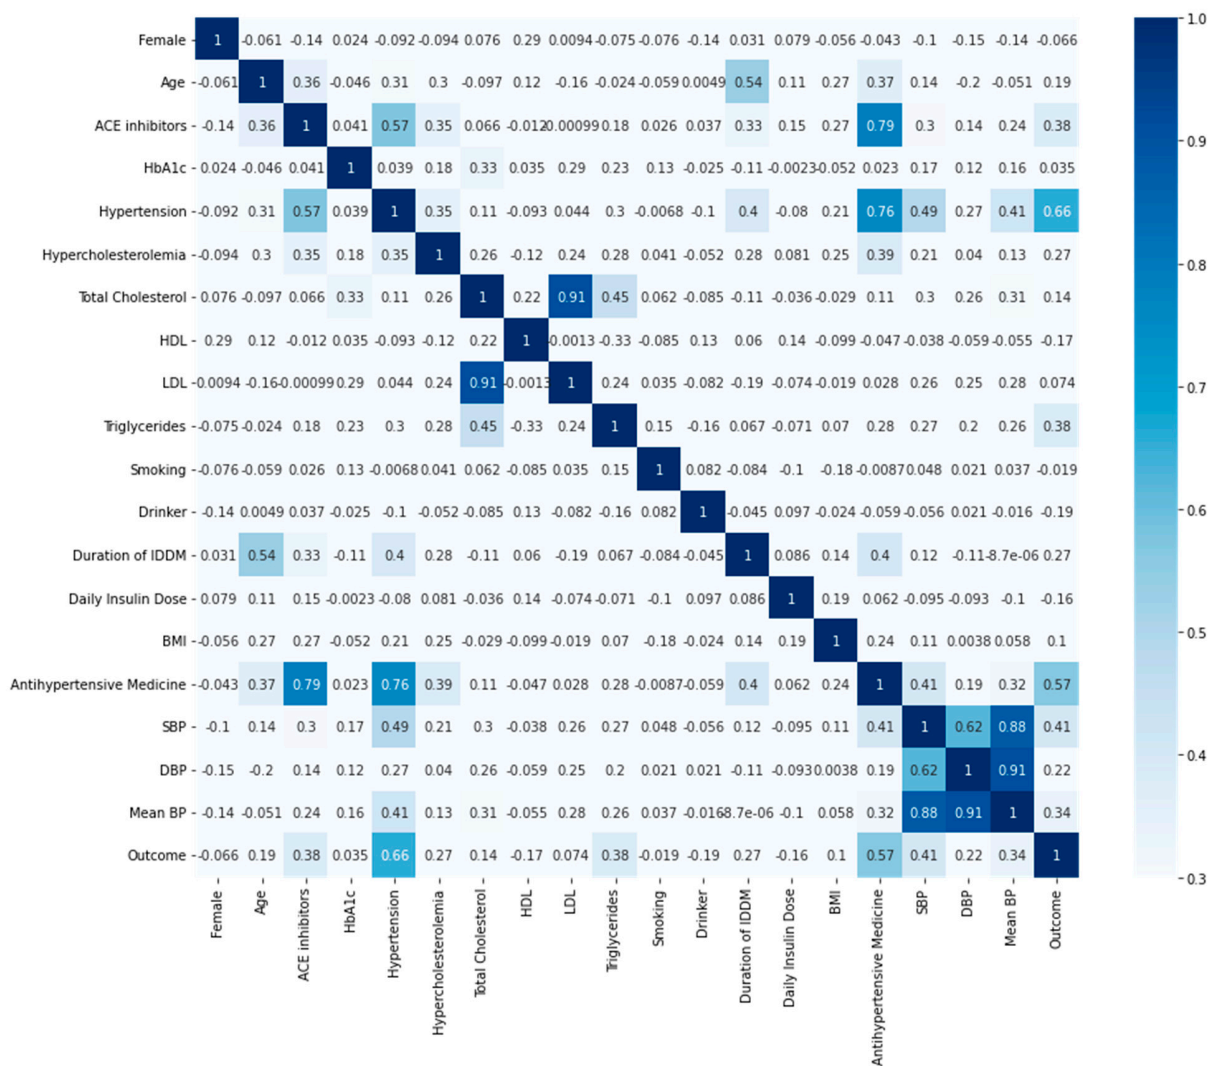

**Figure S2:** Features correlation heatmap of Dataset MICE.

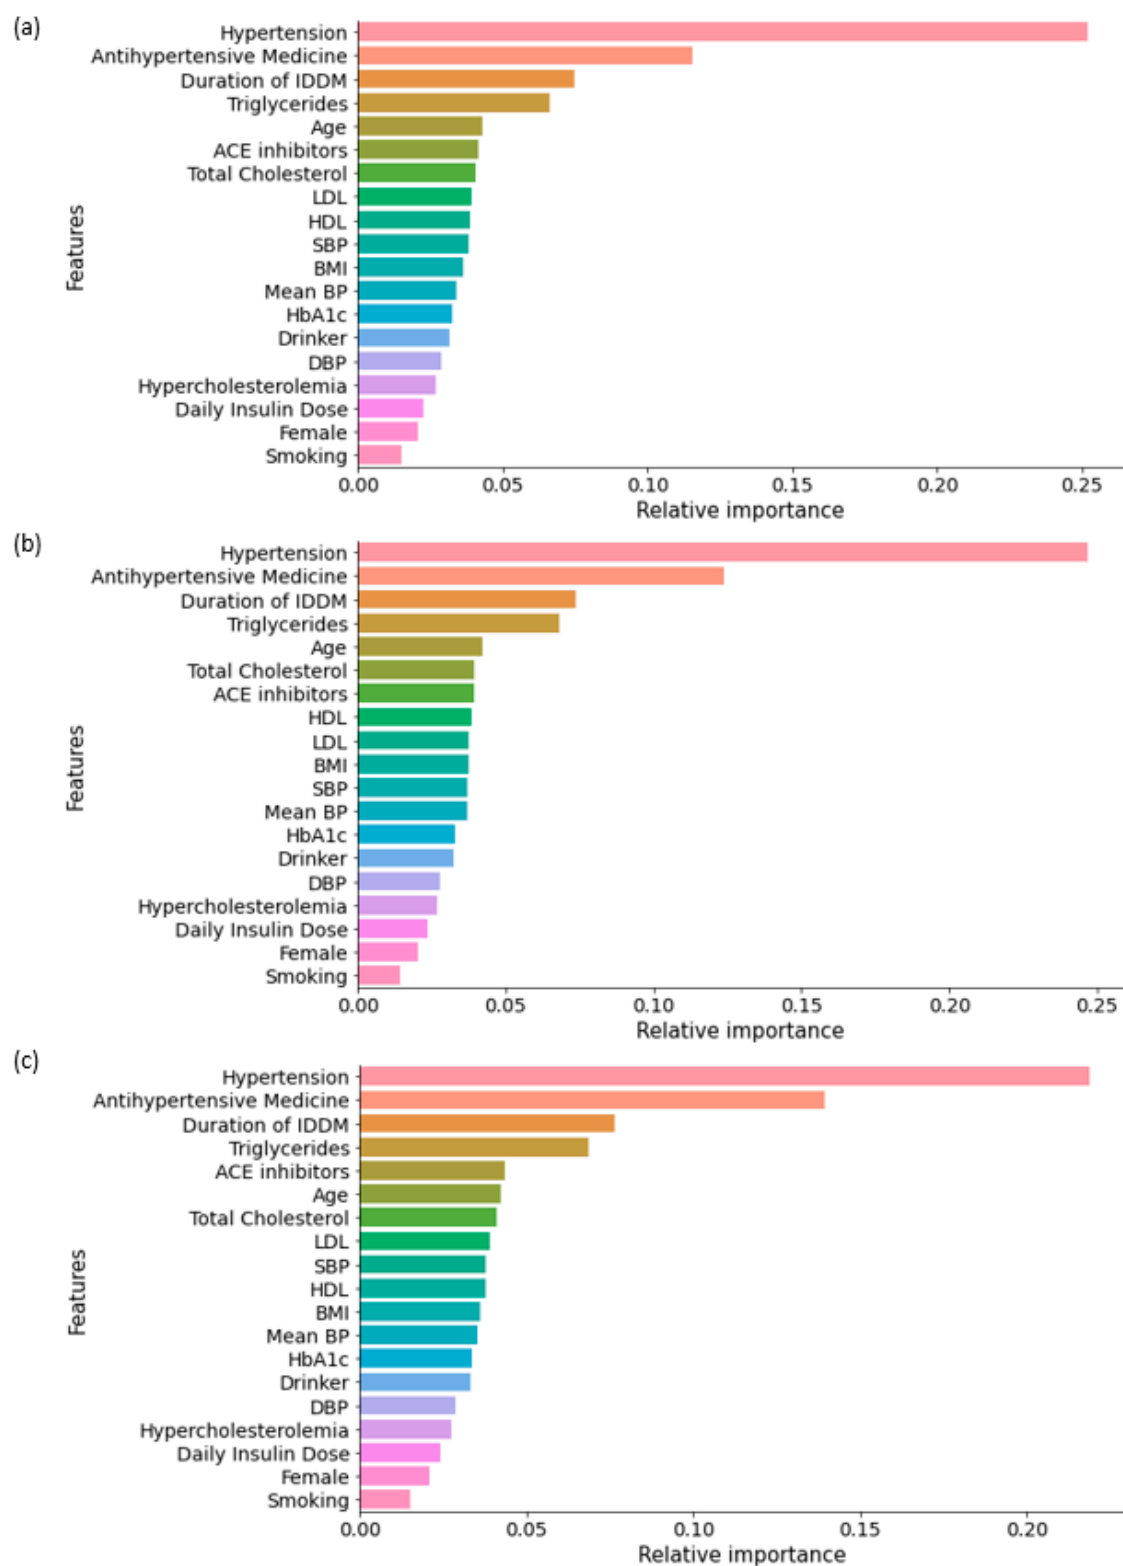

**Figure S3:** Features ranking using Extra tree algorithm. (a) on Dataset KNN (b) on Dataset MICE (c) on Dataset RF.

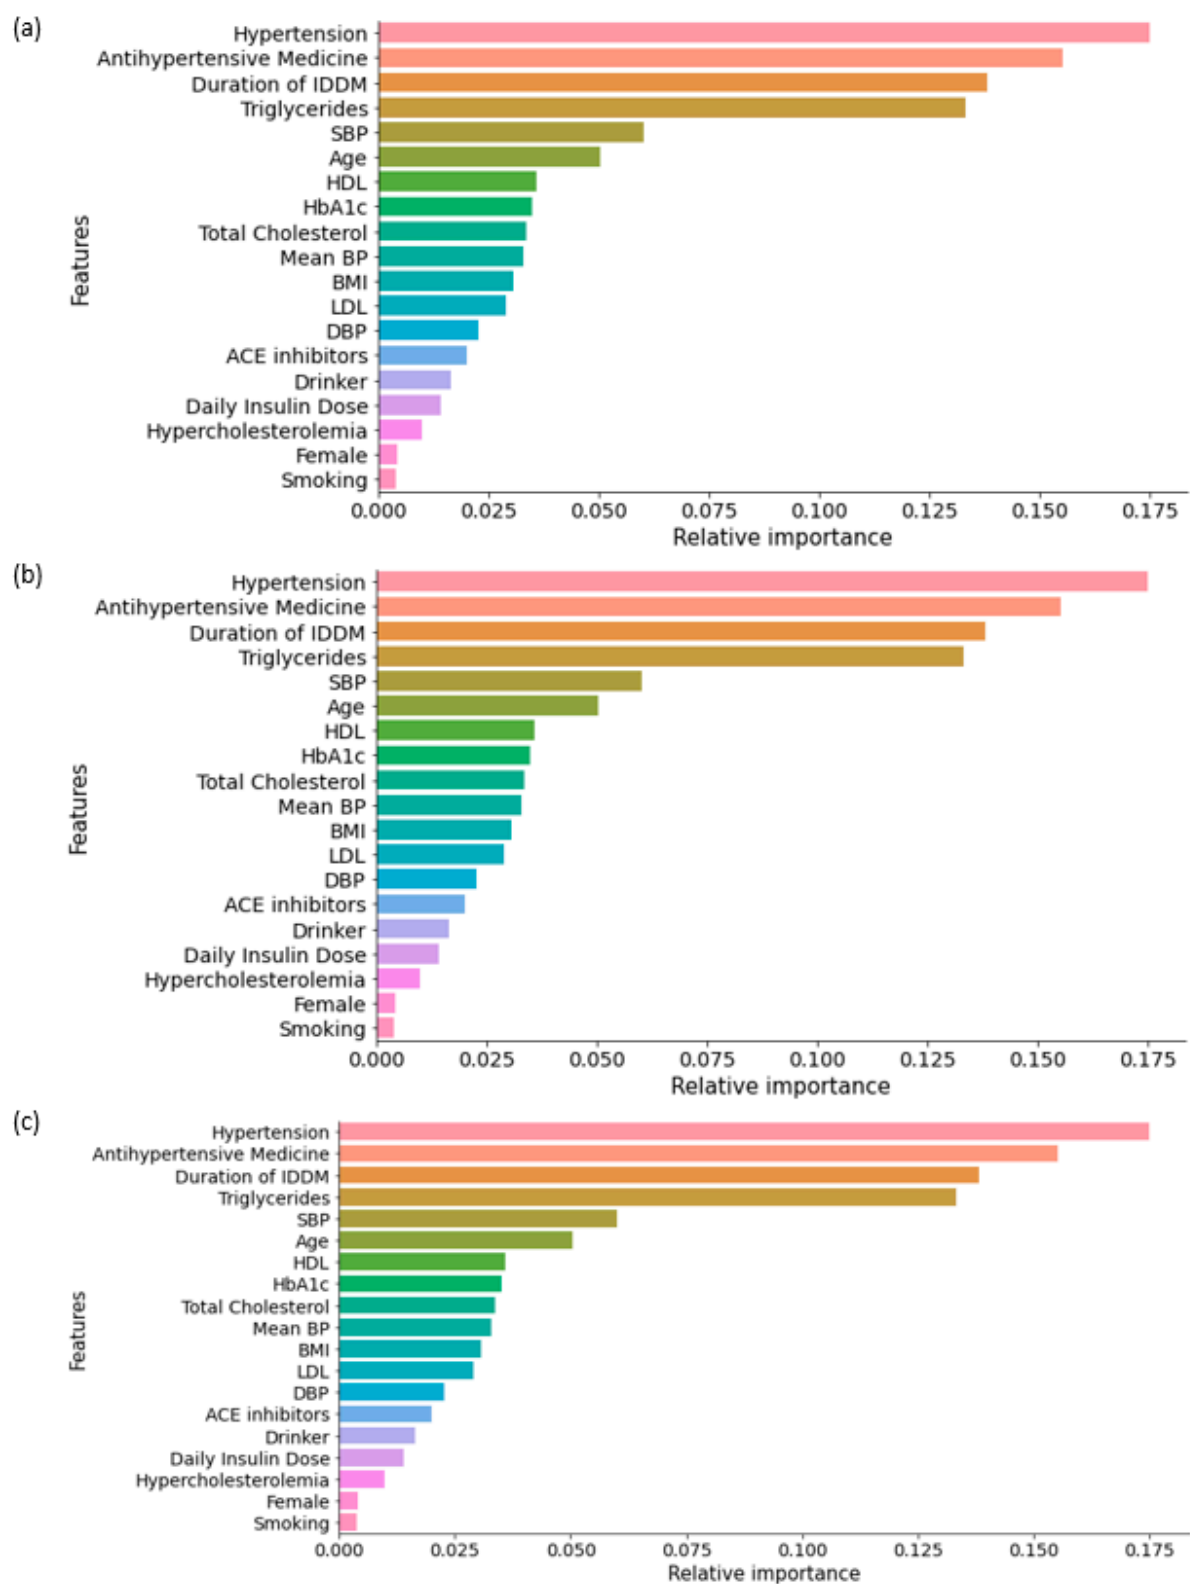

**Figure S4:** Features ranking using RF algorithm. (a) on Dataset KNN (b) on Dataset MICE (c) on Dataset RF.

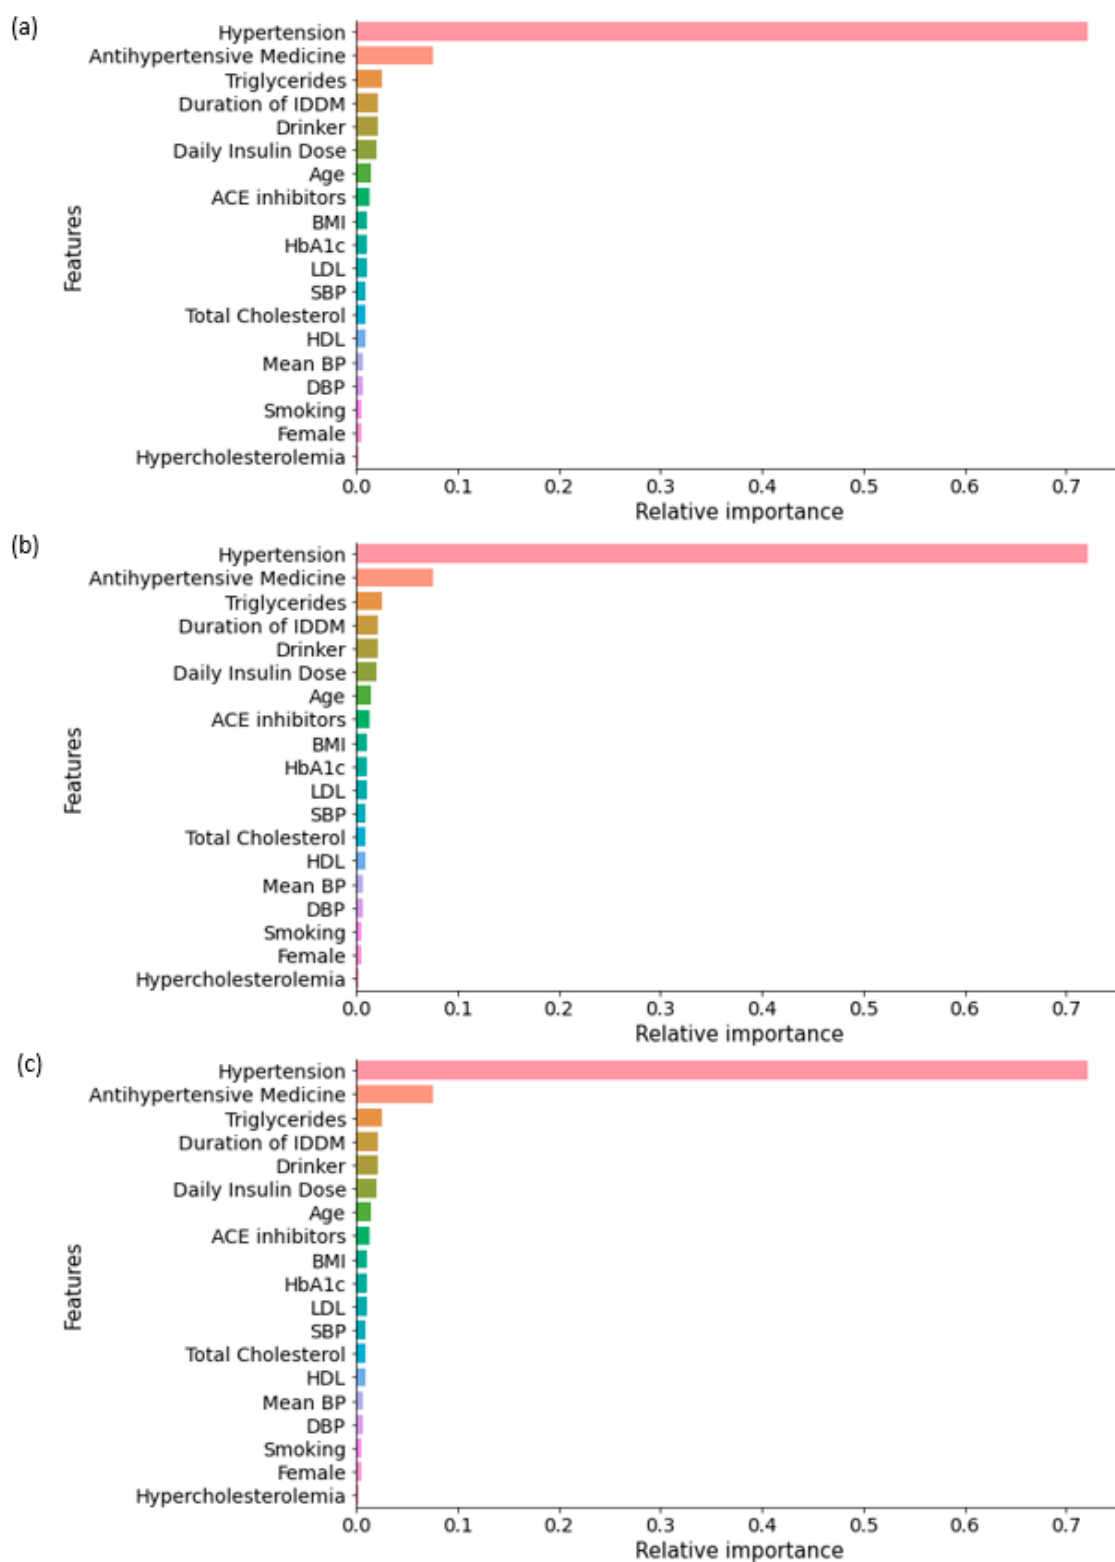

**Figure S5:** Features ranking using XGB algorithm. (a) on Dataset KNN (b) on Dataset MICE (c) on Dataset RF.

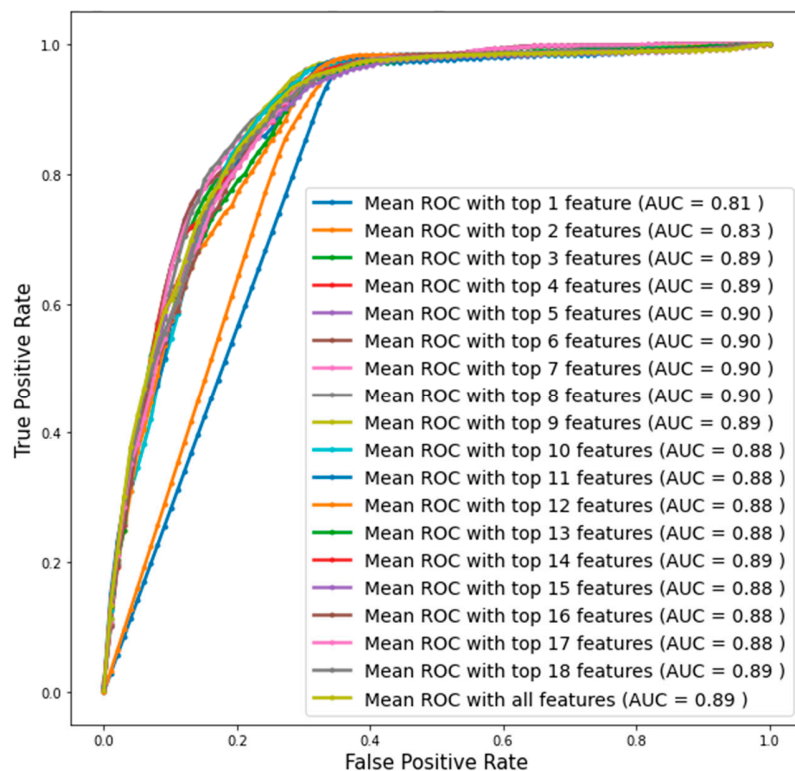

**Figure S6:** ROC curve of LR model with different features ranked by Extra Tree on Dataset KNN.

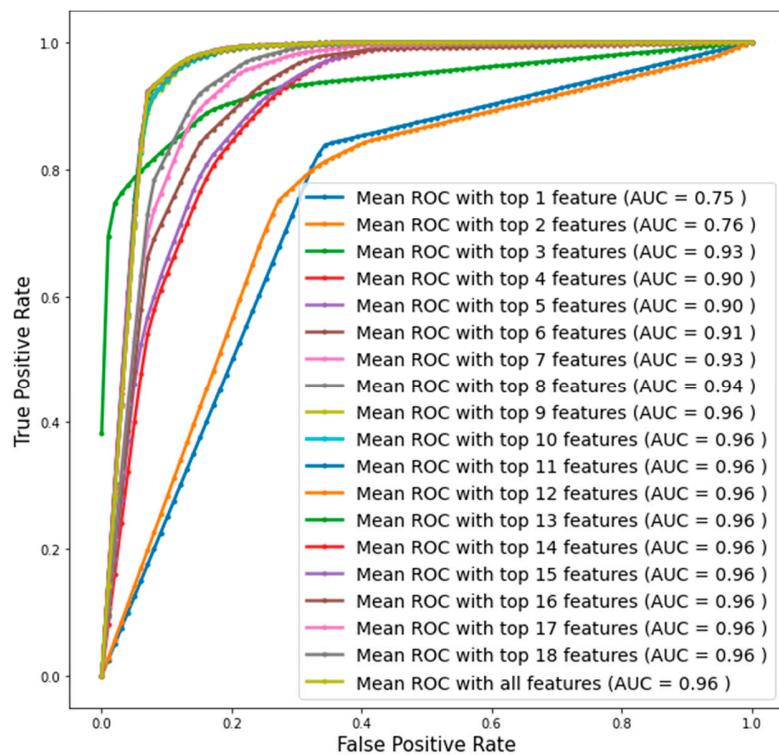

**Figure S7:** ROC curve of KNN model with different features ranked by Extra Tree on Dataset KNN.

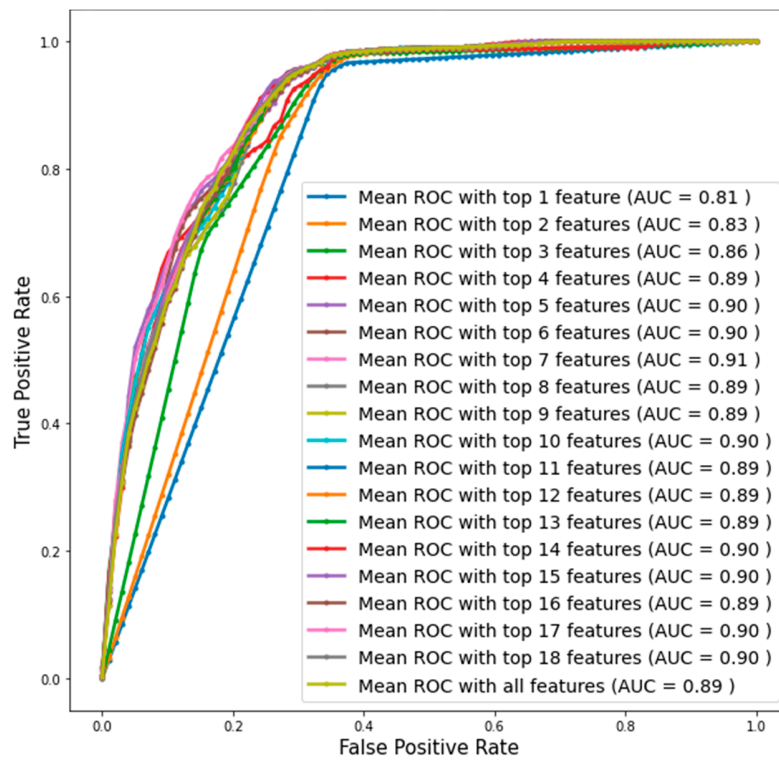

**Figure S8:** ROC curve of GNB model with different features ranked by XGB on Dataset KNN.

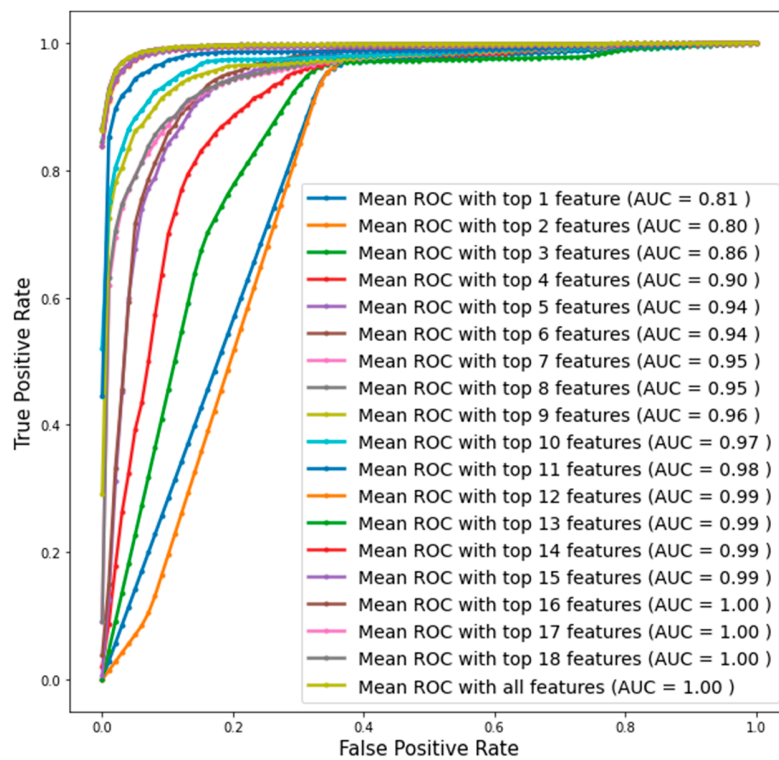

**Figure S9:** ROC curve of SVM model with different features ranked by XGB on Dataset KNN.



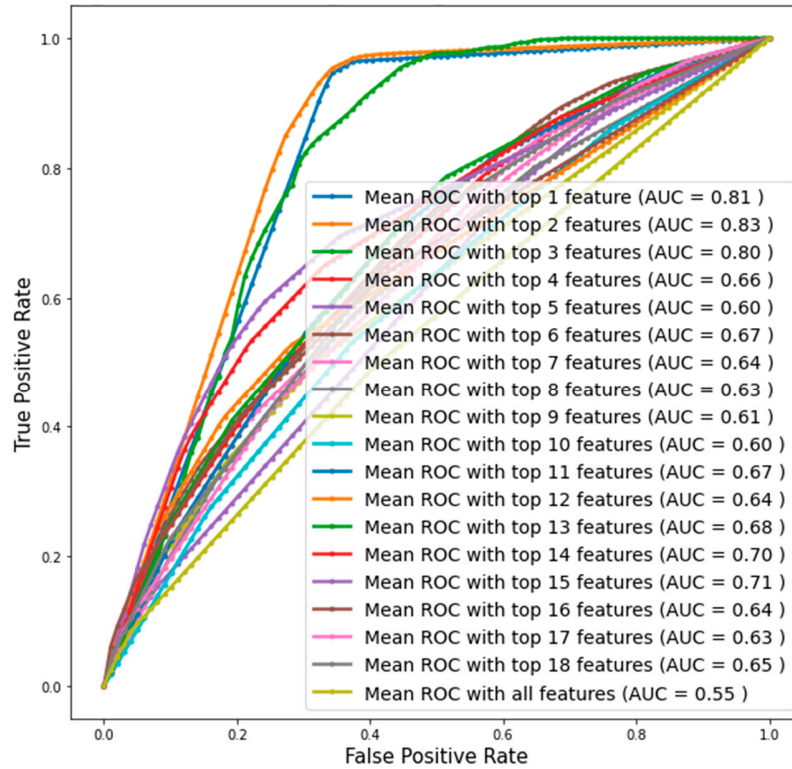

**Figure S10:** ROC curve of SGD model with different features ranked by Extra Tree on Dataset KNN.

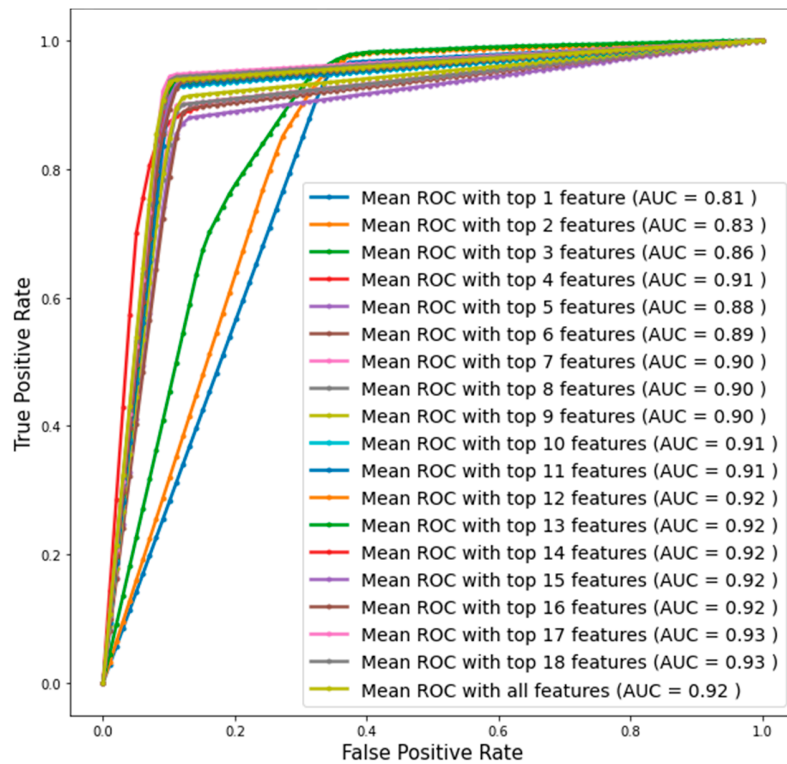

**Figure S11:** ROC curve of DT model with different features ranked by XGB on Dataset KNN.



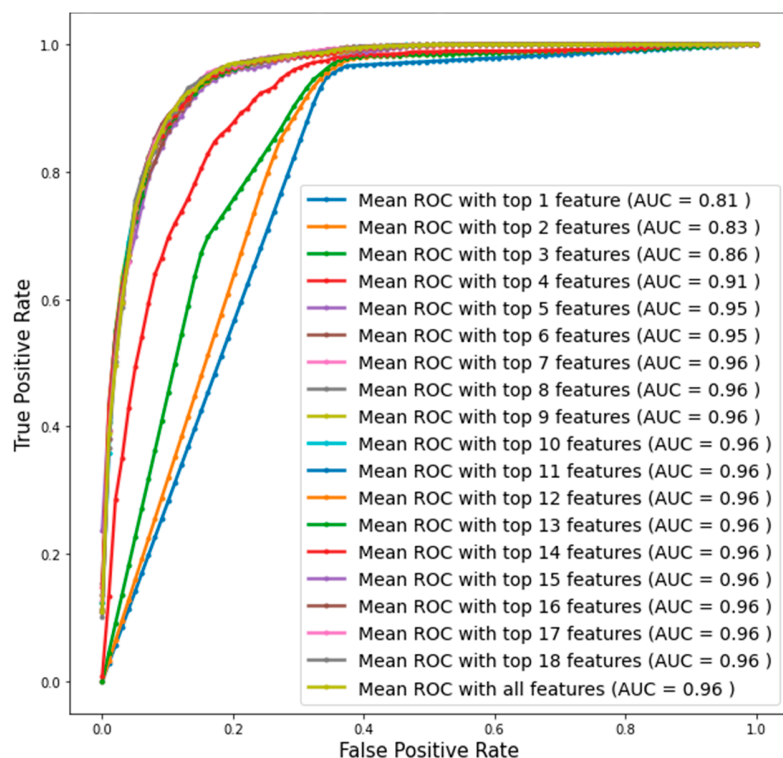

**Figure S12:** ROC curve of GB model with different features ranked by XGB on Dataset KNN.

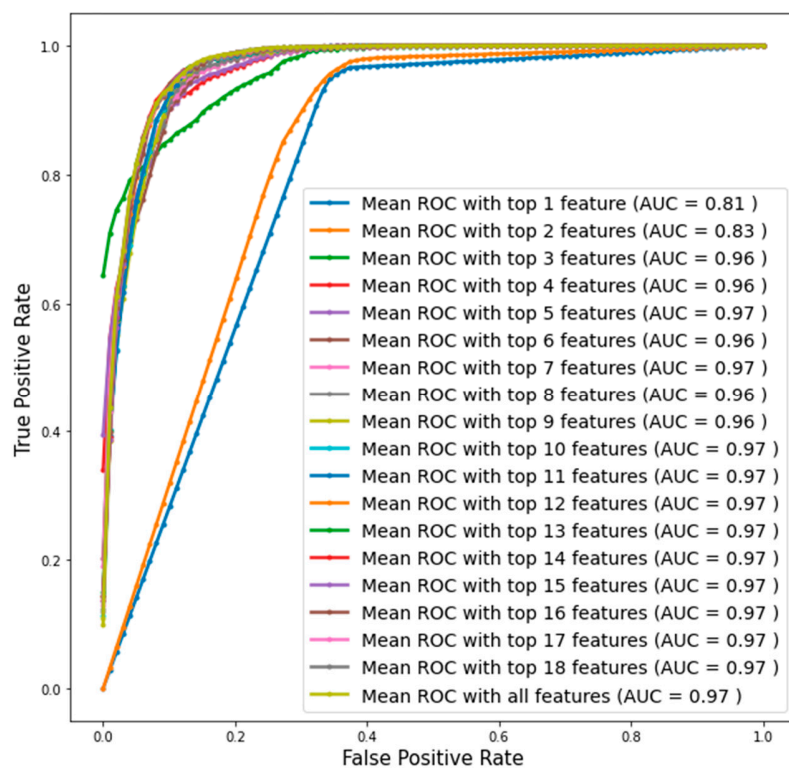

**Figure S13:** ROC curve of XGB model with different features ranked by Extra Tree on Dataset KNN.

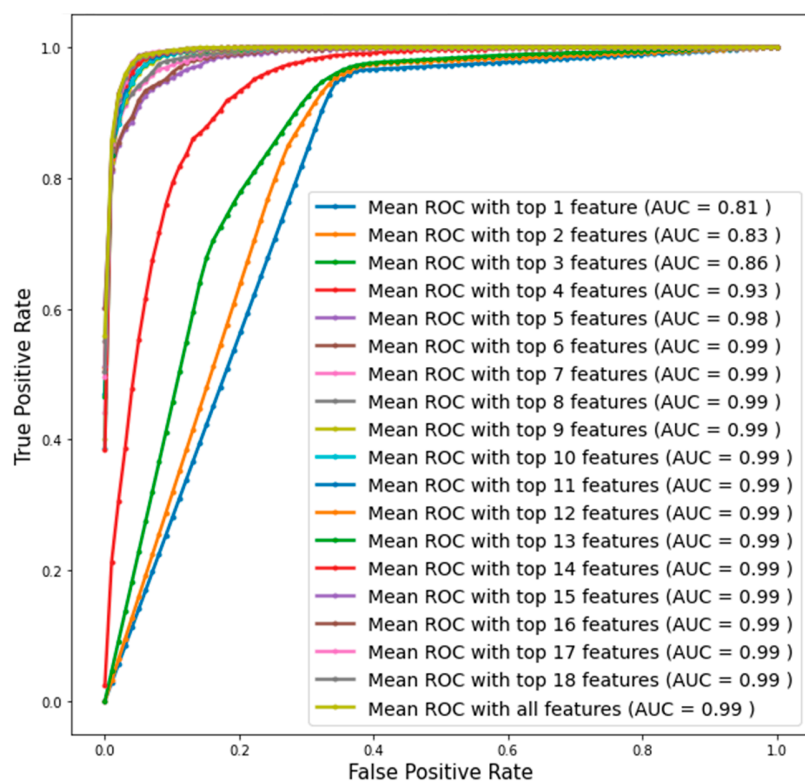

**Figure S14:** ROC curve of LightGBM model with different features ranked by XGB on Dataset KNN.

**Table S1.** Performance analysis of LR algorithm using KNN data imputation and Extra Tree feature ranking.

| Number of Features | Sensitivity<br>(Recall) | Specificity | Accuracy    | Precision   | F1_Score    | Non-CKD       |                | CKD            |               |
|--------------------|-------------------------|-------------|-------------|-------------|-------------|---------------|----------------|----------------|---------------|
|                    |                         |             |             |             |             | True Negative | False Positive | False Negative | True Positive |
| 1                  | 0.97(±0.01)             | 0.66(±0.03) | 0.81(±0.01) | 0.74(±0.02) | 0.84(±0.01) | 1822          | 959            | 91             | 2699          |
| 2                  | 0.97(±0.01)             | 0.66(±0.03) | 0.81(±0.01) | 0.74(±0.02) | 0.84(±0.01) | 1822          | 959            | 91             | 2699          |
| 3                  | 0.94(±0.01)             | 0.70(±0.04) | 0.82(±0.01) | 0.76(±0.02) | 0.84(±0.01) | 1939          | 842            | 171            | 2619          |
| 4                  | 0.94(±0.01)             | 0.70(±0.04) | 0.82(±0.01) | 0.76(±0.02) | 0.84(±0.01) | 1946          | 835            | 170            | 2620          |
| 5                  | 0.94(±0.01)             | 0.70(±0.04) | 0.82(±0.01) | 0.76(±0.02) | 0.84(±0.01) | 1953          | 828            | 170            | 2620          |
| 6                  | 0.94(±0.01)             | 0.70(±0.04) | 0.82(±0.01) | 0.76(±0.02) | 0.84(±0.01) | 1949          | 832            | 170            | 2620          |
| 7                  | 0.92(±0.03)             | 0.72(±0.04) | 0.82(±0.02) | 0.77(±0.02) | 0.83(±0.02) | 1997          | 784            | 229            | 2561          |
| 8                  | 0.93(±0.04)             | 0.72(±0.04) | 0.83(±0.01) | 0.77(±0.02) | 0.84(±0.01) | 1999          | 782            | 187            | 2603          |
| 9                  | 0.93(±0.05)             | 0.73(±0.05) | 0.83(±0.01) | 0.78(±0.03) | 0.84(±0.01) | 2029          | 752            | 200            | 2590          |
| 10                 | 0.93(±0.04)             | 0.73(±0.05) | 0.83(±0.01) | 0.77(±0.03) | 0.84(±0.01) | 2027          | 754            | 204            | 2586          |
| 11                 | 0.89(±0.08)             | 0.73(±0.05) | 0.81(±0.02) | 0.77(±0.02) | 0.82(±0.03) | 2036          | 745            | 316            | 2474          |
| 12                 | 0.86(±0.05)             | 0.74(±0.03) | 0.80(±0.02) | 0.77(±0.02) | 0.81(±0.02) | 2065          | 716            | 385            | 2405          |
| 13                 | 0.87(±0.04)             | 0.75(±0.05) | 0.81(±0.02) | 0.78(±0.03) | 0.82(±0.02) | 2076          | 705            | 360            | 2430          |
| 14                 | 0.87(±0.03)             | 0.76(±0.04) | 0.81(±0.02) | 0.78(±0.03) | 0.82(±0.01) | 2110          | 671            | 362            | 2428          |
| 15                 | 0.87(±0.03)             | 0.76(±0.04) | 0.81(±0.01) | 0.78(±0.02) | 0.82(±0.01) | 2114          | 667            | 373            | 2417          |
| 16                 | 0.87(±0.03)             | 0.76(±0.04) | 0.82(±0.02) | 0.79(±0.03) | 0.83(±0.02) | 2121          | 660            | 361            | 2429          |
| 17                 | 0.87(±0.02)             | 0.76(±0.03) | 0.81(±0.02) | 0.79(±0.02) | 0.82(±0.02) | 2121          | 660            | 376            | 2414          |
| 18                 | 0.87(±0.04)             | 0.76(±0.04) | 0.82(±0.02) | 0.79(±0.03) | 0.83(±0.02) | 2122          | 659            | 364            | 2426          |
| 19                 | 0.88(±0.06)             | 0.77(±0.06) | 0.82(±0.02) | 0.79(±0.03) | 0.83(±0.02) | 2131          | 650            | 339            | 2451          |

**Table S2.** Performance analysis of KNN algorithm using KNN data imputation and Extra Tree feature ranking.

| Number of Features | Sensitivity<br>(Recall) | Specificity | Accuracy    | Precision   | F1_Score    | Non-CKD       |                | CKD            |               |
|--------------------|-------------------------|-------------|-------------|-------------|-------------|---------------|----------------|----------------|---------------|
|                    |                         |             |             |             |             | True Negative | False Positive | False Negative | True Positive |
| 1                  | 0.58(±0.94)             | 0.80(±0.33) | 0.69(±0.31) | 0.44(±0.73) | 0.50(±0.82) | 2220          | 562            | 1180           | 1610          |
| 2                  | 0.52(±0.85)             | 0.84(±0.26) | 0.68(±0.29) | 0.46(±0.75) | 0.49(±0.80) | 2342          | 440            | 1346           | 1444          |
| 3                  | 0.80(±0.46)             | 0.92(±0.08) | 0.86(±0.20) | 0.91(±0.06) | 0.83(±0.33) | 2562          | 220            | 566            | 2224          |
| 4                  | 0.91(±0.03)             | 0.74(±0.04) | 0.83(±0.02) | 0.78(±0.03) | 0.84(±0.02) | 2072          | 710            | 251            | 2539          |
| 5                  | 0.91(±0.03)             | 0.75(±0.03) | 0.83(±0.03) | 0.79(±0.02) | 0.84(±0.02) | 2094          | 688            | 248            | 2542          |
| 6                  | 0.93(±0.02)             | 0.76(±0.02) | 0.84(±0.02) | 0.79(±0.02) | 0.86(±0.02) | 2111          | 671            | 194            | 2596          |
| 7                  | 0.95(±0.01)             | 0.79(±0.01) | 0.87(±0.01) | 0.82(±0.01) | 0.88(±0.01) | 2184          | 598            | 128            | 2662          |
| 8                  | 0.97(±0.01)             | 0.77(±0.02) | 0.87(±0.01) | 0.81(±0.01) | 0.88(±0.01) | 2152          | 630            | 78             | 2712          |
| 9                  | 0.99(±0.02)             | 0.81(±0.03) | 0.90(±0.01) | 0.84(±0.02) | 0.91(±0.01) | 2240          | 542            | 33             | 2757          |
| 10                 | 0.99(±0.01)             | 0.80(±0.04) | 0.90(±0.02) | 0.83(±0.03) | 0.90(±0.01) | 2223          | 559            | 26             | 2764          |
| 11                 | 0.99(±0.01)             | 0.80(±0.04) | 0.90(±0.02) | 0.83(±0.03) | 0.91(±0.01) | 2230          | 552            | 24             | 2766          |
| 12                 | 0.99(±0.01)             | 0.80(±0.04) | 0.90(±0.02) | 0.83(±0.03) | 0.91(±0.01) | 2229          | 553            | 24             | 2766          |
| 13                 | 0.99(±0.01)             | 0.80(±0.04) | 0.90(±0.02) | 0.83(±0.03) | 0.91(±0.01) | 2230          | 552            | 24             | 2766          |
| 14                 | 0.99(±0.01)             | 0.80(±0.04) | 0.90(±0.02) | 0.83(±0.03) | 0.91(±0.02) | 2230          | 552            | 19             | 2771          |
| 15                 | 0.99(±0.01)             | 0.80(±0.04) | 0.90(±0.02) | 0.83(±0.03) | 0.91(±0.02) | 2230          | 552            | 19             | 2771          |
| 16                 | 0.99(±0.01)             | 0.80(±0.04) | 0.90(±0.02) | 0.83(±0.03) | 0.90(±0.01) | 2216          | 566            | 19             | 2771          |
| 17                 | 0.99(±0.01)             | 0.80(±0.04) | 0.90(±0.02) | 0.83(±0.03) | 0.90(±0.01) | 2216          | 566            | 19             | 2771          |
| 18                 | 0.99(±0.01)             | 0.80(±0.04) | 0.90(±0.02) | 0.83(±0.03) | 0.90(±0.01) | 2217          | 565            | 19             | 2771          |
| 19                 | 0.99(±0.01)             | 0.80(±0.04) | 0.90(±0.02) | 0.83(±0.03) | 0.90(±0.01) | 2217          | 565            | 19             | 2771          |

**Table S3.** Performance analysis of GNB algorithm using KNN data imputation and XGB feature ranking.

| Number of Features | Sensitivity<br>(Recall) | Specificity | Accuracy    | Precision   | F1_Score    | Non-CKD       |                | CKD            |               |
|--------------------|-------------------------|-------------|-------------|-------------|-------------|---------------|----------------|----------------|---------------|
|                    |                         |             |             |             |             | True Negative | False Positive | False Negative | True Positive |
| 1                  | 0.96(±0.01)             | 0.66(±0.03) | 0.81(±0.01) | 0.74(±0.02) | 0.84(±0.01) | 1824          | 958            | 100            | 2690          |
| 2                  | 0.87(±0.02)             | 0.73(±0.04) | 0.80(±0.02) | 0.76(±0.03) | 0.81(±0.02) | 2017          | 765            | 374            | 2416          |
| 3                  | 0.87(±0.02)             | 0.73(±0.04) | 0.80(±0.02) | 0.76(±0.03) | 0.81(±0.02) | 2017          | 765            | 374            | 2416          |
| 4                  | 0.88(±0.02)             | 0.72(±0.04) | 0.80(±0.02) | 0.76(±0.03) | 0.82(±0.02) | 2006          | 776            | 333            | 2457          |
| 5                  | 0.88(±0.03)             | 0.74(±0.04) | 0.81(±0.02) | 0.77(±0.03) | 0.82(±0.01) | 2059          | 723            | 325            | 2465          |
| 6                  | 0.89(±0.03)             | 0.74(±0.04) | 0.82(±0.02) | 0.77(±0.03) | 0.83(±0.02) | 2057          | 725            | 298            | 2492          |
| 7                  | 0.93(±0.02)             | 0.74(±0.04) | 0.83(±0.02) | 0.78(±0.03) | 0.85(±0.01) | 2056          | 726            | 198            | 2592          |
| 8                  | 0.92(±0.03)             | 0.74(±0.04) | 0.83(±0.02) | 0.78(±0.02) | 0.84(±0.02) | 2047          | 735            | 234            | 2556          |
| 9                  | 0.92(±0.03)             | 0.74(±0.04) | 0.83(±0.02) | 0.78(±0.02) | 0.84(±0.01) | 2049          | 733            | 224            | 2566          |
| 10                 | 0.92(±0.03)             | 0.74(±0.04) | 0.83(±0.02) | 0.78(±0.03) | 0.84(±0.02) | 2047          | 735            | 223            | 2567          |
| 11                 | 0.92(±0.03)             | 0.74(±0.04) | 0.83(±0.02) | 0.78(±0.03) | 0.84(±0.02) | 2048          | 734            | 235            | 2555          |
| 12                 | 0.92(±0.03)             | 0.74(±0.04) | 0.83(±0.02) | 0.78(±0.03) | 0.84(±0.02) | 2047          | 735            | 233            | 2557          |
| 13                 | 0.92(±0.03)             | 0.74(±0.04) | 0.83(±0.02) | 0.78(±0.03) | 0.85(±0.02) | 2051          | 731            | 214            | 2576          |
| 14                 | 0.93(±0.02)             | 0.74(±0.05) | 0.83(±0.02) | 0.78(±0.03) | 0.85(±0.01) | 2066          | 716            | 206            | 2584          |
| 15                 | 0.93(±0.03)             | 0.75(±0.05) | 0.84(±0.02) | 0.79(±0.03) | 0.85(±0.01) | 2074          | 708            | 203            | 2587          |
| 16                 | 0.91(±0.02)             | 0.75(±0.05) | 0.83(±0.02) | 0.78(±0.03) | 0.84(±0.01) | 2083          | 699            | 255            | 2535          |
| 17                 | 0.90(±0.02)             | 0.75(±0.04) | 0.83(±0.02) | 0.78(±0.03) | 0.84(±0.01) | 2082          | 700            | 268            | 2522          |
| 18                 | 0.90(±0.02)             | 0.75(±0.05) | 0.83(±0.02) | 0.78(±0.03) | 0.84(±0.01) | 2084          | 698            | 274            | 2516          |
| 19                 | 0.90(±0.02)             | 0.75(±0.04) | 0.82(±0.02) | 0.78(±0.02) | 0.84(±0.01) | 2087          | 695            | 286            | 2504          |

**Table S4.** Performance analysis of SVM algorithm using KNN data imputation and XGB feature ranking.

| Number of Features | Sensitivity<br>(Recall) | Specificity | Accuracy    | Precision   | F1_Score    | Non-CKD       |                | CKD            |               |
|--------------------|-------------------------|-------------|-------------|-------------|-------------|---------------|----------------|----------------|---------------|
|                    |                         |             |             |             |             | True Negative | False Positive | False Negative | True Positive |
| 1                  | 0.97(±0.00)             | 0.66(±0.03) | 0.81(±0.02) | 0.74(±0.02) | 0.84(±0.01) | 1825          | 957            | 86             | 2704          |
| 2                  | 0.97(±0.00)             | 0.66(±0.03) | 0.81(±0.02) | 0.74(±0.02) | 0.84(±0.01) | 1825          | 957            | 86             | 2704          |
| 3                  | 0.96(±0.01)             | 0.68(±0.04) | 0.82(±0.02) | 0.75(±0.02) | 0.84(±0.01) | 1895          | 887            | 115            | 2675          |
| 4                  | 0.90(±0.02)             | 0.78(±0.03) | 0.84(±0.02) | 0.80(±0.02) | 0.85(±0.01) | 2170          | 612            | 269            | 2521          |
| 5                  | 0.93(±0.03)             | 0.83(±0.04) | 0.88(±0.02) | 0.85(±0.03) | 0.89(±0.01) | 2315          | 467            | 205            | 2585          |
| 6                  | 0.94(±0.02)             | 0.83(±0.04) | 0.88(±0.01) | 0.85(±0.03) | 0.89(±0.01) | 2316          | 466            | 179            | 2611          |
| 7                  | 0.88(±0.04)             | 0.89(±0.02) | 0.89(±0.01) | 0.89(±0.02) | 0.89(±0.01) | 2481          | 301            | 329            | 2461          |
| 8                  | 0.89(±0.04)             | 0.89(±0.02) | 0.89(±0.01) | 0.89(±0.02) | 0.89(±0.01) | 2463          | 319            | 307            | 2483          |
| 9                  | 0.88(±0.06)             | 0.94(±0.01) | 0.91(±0.02) | 0.93(±0.01) | 0.90(±0.03) | 2603          | 179            | 335            | 2455          |
| 10                 | 0.78(±0.07)             | 0.99(±0.01) | 0.88(±0.03) | 0.98(±0.01) | 0.87(±0.04) | 2741          | 41             | 627            | 2163          |
| 11                 | 0.71(±0.09)             | 1.00(±0.00) | 0.85(±0.05) | 1.00(±0.00) | 0.83(±0.06) | 2780          | 2              | 820            | 1970          |
| 12                 | 0.69(±0.09)             | 1.00(±0.00) | 0.84(±0.05) | 1.00(±0.00) | 0.81(±0.07) | 2782          | 0              | 874            | 1916          |
| 13                 | 0.69(±0.09)             | 1.00(±0.00) | 0.85(±0.05) | 1.00(±0.00) | 0.82(±0.06) | 2782          | 0              | 853            | 1937          |
| 14                 | 0.68(±0.10)             | 1.00(±0.00) | 0.84(±0.05) | 1.00(±0.00) | 0.81(±0.07) | 2782          | 0              | 890            | 1900          |
| 15                 | 0.69(±0.10)             | 1.00(±0.00) | 0.84(±0.05) | 1.00(±0.00) | 0.82(±0.07) | 2782          | 0              | 866            | 1924          |
| 16                 | 0.67(±0.11)             | 1.00(±0.00) | 0.84(±0.06) | 1.00(±0.00) | 0.80(±0.08) | 2782          | 0              | 915            | 1875          |
| 17                 | 0.68(±0.10)             | 1.00(±0.00) | 0.84(±0.05) | 1.00(±0.00) | 0.81(±0.07) | 2782          | 0              | 886            | 1904          |
| 18                 | 0.69(±0.10)             | 1.00(±0.00) | 0.84(±0.05) | 1.00(±0.00) | 0.81(±0.07) | 2782          | 0              | 869            | 1921          |
| 19                 | 0.69(±0.10)             | 1.00(±0.00) | 0.84(±0.05) | 1.00(±0.00) | 0.81(±0.07) | 2782          | 0              | 872            | 1918          |



**Table S5.** Performance analysis of SGD algorithm using KNN data imputation and Extra Tree feature ranking.

| Number of Features | Sensitivity<br>(Recall) | Specificity        | Accuracy           | Precision          | F1_Score           | Non-CKD       |                | CKD            |               |
|--------------------|-------------------------|--------------------|--------------------|--------------------|--------------------|---------------|----------------|----------------|---------------|
|                    |                         |                    |                    |                    |                    | True Negative | False Positive | False Negative | True Positive |
| 1                  | 0.37( $\pm 0.90$ )      | 0.82( $\pm 0.30$ ) | 0.69( $\pm 0.31$ ) | 0.60( $\pm 0.60$ ) | 0.66( $\pm 0.66$ ) | 1744          | 1039           | 137            | 2653          |
| 2                  | 0.96( $\pm 0.01$ )      | 0.74( $\pm 0.27$ ) | 0.80( $\pm 0.02$ ) | 0.59( $\pm 0.59$ ) | 0.49( $\pm 0.80$ ) | 1860          | 923            | 159            | 2631          |
| 3                  | 0.96( $\pm 0.01$ )      | 0.65( $\pm 0.03$ ) | 0.81( $\pm 0.02$ ) | 0.74( $\pm 0.02$ ) | 0.83( $\pm 0.01$ ) | 2013          | 770            | 642            | 2148          |
| 4                  | 0.32( $\pm 0.74$ )      | 0.43( $\pm 0.75$ ) | 0.69( $\pm 0.22$ ) | 0.62( $\pm 0.68$ ) | 0.32( $\pm 0.68$ ) | 1252          | 1531           | 331            | 2459          |
| 5                  | 0.79( $\pm 0.79$ )      | 0.88( $\pm 0.19$ ) | 0.63( $\pm 0.17$ ) | 0.44( $\pm 0.47$ ) | 0.61( $\pm 0.47$ ) | 1881          | 902            | 931            | 1859          |
| 6                  | 0.87( $\pm 0.51$ )      | 0.51( $\pm 0.66$ ) | 0.53( $\pm 0.07$ ) | 0.57( $\pm 0.61$ ) | 0.51( $\pm 0.56$ ) | 1535          | 1248           | 1164           | 1626          |
| 7                  | 0.74( $\pm 0.65$ )      | 0.66( $\pm 0.63$ ) | 0.62( $\pm 0.07$ ) | 0.71( $\pm 0.22$ ) | 0.60( $\pm 0.39$ ) | 2272          | 511            | 1819           | 971           |
| 8                  | 0.79( $\pm 0.79$ )      | 0.65( $\pm 0.69$ ) | 0.66( $\pm 0.14$ ) | 0.70( $\pm 0.20$ ) | 0.53( $\pm 0.28$ ) | 1612          | 1171           | 1312           | 1478          |
| 9                  | 0.91( $\pm 0.19$ )      | 0.60( $\pm 0.79$ ) | 0.59( $\pm 0.11$ ) | 0.72( $\pm 0.24$ ) | 0.62( $\pm 0.25$ ) | 903           | 1880           | 329            | 2461          |
| 10                 | 0.61( $\pm 0.95$ )      | 0.64( $\pm 0.62$ ) | 0.59( $\pm 0.14$ ) | 0.71( $\pm 0.17$ ) | 0.45( $\pm 0.52$ ) | 1299          | 1484           | 446            | 2344          |
| 11                 | 0.50( $\pm 0.55$ )      | 0.62( $\pm 0.82$ ) | 0.62( $\pm 0.14$ ) | 0.73( $\pm 0.18$ ) | 0.59( $\pm 0.28$ ) | 1429          | 1354           | 449            | 2341          |
| 12                 | 0.91( $\pm 0.14$ )      | 0.92( $\pm 0.14$ ) | 0.65( $\pm 0.10$ ) | 0.73( $\pm 0.29$ ) | 0.36( $\pm 0.67$ ) | 1452          | 1331           | 708            | 2082          |
| 13                 | 0.61( $\pm 0.73$ )      | 0.64( $\pm 0.71$ ) | 0.67( $\pm 0.07$ ) | 0.47( $\pm 0.49$ ) | 0.54( $\pm 0.38$ ) | 1602          | 1181           | 875            | 1915          |
| 14                 | 0.88( $\pm 0.21$ )      | 0.74( $\pm 0.56$ ) | 0.61( $\pm 0.20$ ) | 0.70( $\pm 0.28$ ) | 0.56( $\pm 0.44$ ) | 1986          | 797            | 1051           | 1739          |
| 15                 | 0.48( $\pm 0.62$ )      | 0.58( $\pm 0.65$ ) | 0.62( $\pm 0.19$ ) | 0.75( $\pm 0.27$ ) | 0.41( $\pm 0.56$ ) | 1975          | 808            | 1010           | 1780          |
| 16                 | 0.73( $\pm 0.64$ )      | 0.89( $\pm 0.27$ ) | 0.65( $\pm 0.10$ ) | 0.48( $\pm 0.52$ ) | 0.53( $\pm 0.58$ ) | 1681          | 1102           | 1171           | 1619          |
| 17                 | 0.60( $\pm 0.53$ )      | 0.64( $\pm 0.73$ ) | 0.62( $\pm 0.17$ ) | 0.76( $\pm 0.27$ ) | 0.58( $\pm 0.34$ ) | 2194          | 589            | 1384           | 1406          |
| 18                 | 0.73( $\pm 0.65$ )      | 0.46( $\pm 0.48$ ) | 0.64( $\pm 0.23$ ) | 0.72( $\pm 0.19$ ) | 0.66( $\pm 0.21$ ) | 1749          | 1034           | 856            | 1934          |
| 19                 | 0.49( $\pm 0.56$ )      | 0.62( $\pm 0.69$ ) | 0.63( $\pm 0.19$ ) | 0.64( $\pm 0.24$ ) | 0.67( $\pm 0.28$ ) | 2607          | 176            | 2079           | 711           |

**Table S6.** Performance analysis of DT algorithm using KNN data imputation and XGB feature ranking.

| Number of Features | Sensitivity<br>(Recall) | Specificity | Accuracy    | Precision   | F1_Score    | Non-CKD       |                | CKD            |               |
|--------------------|-------------------------|-------------|-------------|-------------|-------------|---------------|----------------|----------------|---------------|
|                    |                         |             |             |             |             | True Negative | False Positive | False Negative | True Positive |
| 1                  | 0.96(±0.01)             | 0.66(±0.03) | 0.81(±0.01) | 0.74(±0.02) | 0.84(±0.01) | 1824          | 958            | 100            | 2690          |
| 2                  | 0.96(±0.01)             | 0.66(±0.03) | 0.81(±0.01) | 0.74(±0.02) | 0.84(±0.01) | 1824          | 958            | 100            | 2690          |
| 3                  | 0.95(±0.01)             | 0.68(±0.04) | 0.82(±0.01) | 0.75(±0.02) | 0.84(±0.01) | 1894          | 888            | 132            | 2658          |
| 4                  | 0.83(±0.13)             | 0.91(±0.03) | 0.87(±0.06) | 0.91(±0.02) | 0.87(±0.08) | 2539          | 243            | 462            | 2328          |
| 5                  | 0.87(±0.16)             | 0.89(±0.02) | 0.88(±0.08) | 0.89(±0.02) | 0.88(±0.10) | 2487          | 295            | 355            | 2435          |
| 6                  | 0.89(±0.16)             | 0.89(±0.03) | 0.89(±0.07) | 0.89(±0.01) | 0.89(±0.08) | 2472          | 310            | 305            | 2485          |
| 7                  | 0.90(±0.15)             | 0.89(±0.02) | 0.90(±0.06) | 0.89(±0.02) | 0.89(±0.08) | 2482          | 300            | 286            | 2504          |
| 8                  | 0.90(±0.14)             | 0.89(±0.02) | 0.90(±0.07) | 0.90(±0.02) | 0.90(±0.08) | 2499          | 283            | 271            | 2519          |
| 9                  | 0.90(±0.13)             | 0.89(±0.01) | 0.90(±0.06) | 0.89(±0.01) | 0.90(±0.07) | 2492          | 290            | 262            | 2528          |
| 10                 | 0.92(±0.08)             | 0.90(±0.01) | 0.91(±0.04) | 0.90(±0.01) | 0.91(±0.04) | 2507          | 275            | 203            | 2587          |
| 11                 | 0.93(±0.06)             | 0.91(±0.02) | 0.92(±0.03) | 0.91(±0.01) | 0.92(±0.03) | 2513          | 269            | 179            | 2611          |
| 12                 | 0.93(±0.05)             | 0.90(±0.02) | 0.92(±0.03) | 0.91(±0.02) | 0.92(±0.03) | 2514          | 268            | 183            | 2607          |
| 13                 | 0.94(±0.04)             | 0.91(±0.01) | 0.92(±0.02) | 0.91(±0.01) | 0.92(±0.02) | 2507          | 275            | 178            | 2612          |
| 14                 | 0.94(±0.04)             | 0.91(±0.01) | 0.92(±0.02) | 0.91(±0.02) | 0.92(±0.02) | 2517          | 265            | 177            | 2613          |
| 15                 | 0.94(±0.06)             | 0.90(±0.03) | 0.92(±0.04) | 0.91(±0.03) | 0.92(±0.04) | 2526          | 256            | 180            | 2610          |
| 16                 | 0.94(±0.05)             | 0.90(±0.03) | 0.92(±0.03) | 0.91(±0.03) | 0.92(±0.04) | 2528          | 254            | 180            | 2610          |
| 17                 | 0.94(±0.03)             | 0.91(±0.01) | 0.93(±0.02) | 0.91(±0.02) | 0.93(±0.02) | 2533          | 249            | 153            | 2637          |
| 18                 | 0.94(±0.04)             | 0.91(±0.02) | 0.93(±0.04) | 0.91(±0.02) | 0.93(±0.03) | 2537          | 245            | 152            | 2638          |
| 19                 | 0.94(±0.05)             | 0.91(±0.02) | 0.92(±0.03) | 0.91(±0.02) | 0.92(±0.03) | 2520          | 262            | 163            | 2627          |

**Table S7.** Performance analysis of GB algorithm using KNN data imputation and Extra Tree feature ranking.

| Number of Features | Sensitivity<br>(Recall) | Specificity | Accuracy    | Precision   | F1_Score    | Non-CKD       |                | CKD            |               |
|--------------------|-------------------------|-------------|-------------|-------------|-------------|---------------|----------------|----------------|---------------|
|                    |                         |             |             |             |             | True Negative | False Positive | False Negative | True Positive |
| 1                  | 0.96(±0.01)             | 0.66(±0.03) | 0.81(±0.01) | 0.74(±0.02) | 0.84(±0.01) | 1824          | 958            | 100            | 2690          |
| 2                  | 0.96(±0.01)             | 0.66(±0.03) | 0.81(±0.01) | 0.74(±0.02) | 0.84(±0.01) | 1824          | 958            | 100            | 2690          |
| 3                  | 0.92(±0.08)             | 0.77(±0.04) | 0.85(±0.04) | 0.80(±0.03) | 0.86(±0.04) | 2148          | 634            | 219            | 2571          |
| 4                  | 0.92(±0.08)             | 0.84(±0.04) | 0.88(±0.03) | 0.85(±0.02) | 0.88(±0.04) | 2331          | 451            | 228            | 2562          |
| 5                  | 0.92(±0.09)             | 0.85(±0.05) | 0.89(±0.03) | 0.86(±0.03) | 0.89(±0.04) | 2360          | 422            | 216            | 2574          |
| 6                  | 0.92(±0.07)             | 0.85(±0.03) | 0.89(±0.03) | 0.86(±0.02) | 0.89(±0.03) | 2368          | 414            | 214            | 2576          |
| 7                  | 0.93(±0.08)             | 0.85(±0.04) | 0.89(±0.03) | 0.86(±0.02) | 0.89(±0.04) | 2370          | 412            | 204            | 2586          |
| 8                  | 0.92(±0.09)             | 0.85(±0.03) | 0.89(±0.04) | 0.86(±0.02) | 0.89(±0.04) | 2369          | 413            | 219            | 2571          |
| 9                  | 0.93(±0.08)             | 0.86(±0.02) | 0.90(±0.03) | 0.87(±0.02) | 0.90(±0.04) | 2395          | 387            | 195            | 2595          |
| 10                 | 0.93(±0.06)             | 0.86(±0.03) | 0.90(±0.03) | 0.87(±0.02) | 0.90(±0.03) | 2391          | 391            | 187            | 2603          |
| 11                 | 0.93(±0.05)             | 0.86(±0.02) | 0.90(±0.03) | 0.87(±0.02) | 0.90(±0.03) | 2394          | 388            | 183            | 2607          |
| 12                 | 0.93(±0.05)             | 0.87(±0.03) | 0.90(±0.02) | 0.88(±0.02) | 0.90(±0.02) | 2413          | 369            | 188            | 2602          |
| 13                 | 0.93(±0.06)             | 0.87(±0.01) | 0.90(±0.03) | 0.88(±0.02) | 0.90(±0.04) | 2426          | 356            | 203            | 2587          |
| 14                 | 0.92(±0.06)             | 0.86(±0.02) | 0.89(±0.03) | 0.87(±0.02) | 0.90(±0.03) | 2405          | 377            | 212            | 2578          |
| 15                 | 0.92(±0.06)             | 0.86(±0.02) | 0.89(±0.03) | 0.87(±0.02) | 0.90(±0.03) | 2405          | 377            | 212            | 2578          |
| 16                 | 0.93(±0.06)             | 0.87(±0.02) | 0.90(±0.03) | 0.88(±0.02) | 0.90(±0.03) | 2425          | 357            | 204            | 2586          |
| 17                 | 0.93(±0.05)             | 0.86(±0.02) | 0.90(±0.03) | 0.87(±0.02) | 0.90(±0.03) | 2404          | 378            | 201            | 2589          |
| 18                 | 0.93(±0.05)             | 0.86(±0.02) | 0.90(±0.03) | 0.87(±0.02) | 0.90(±0.03) | 2404          | 378            | 201            | 2589          |
| 19                 | 0.92(±0.06)             | 0.86(±0.02) | 0.89(±0.04) | 0.87(±0.02) | 0.90(±0.04) | 2406          | 376            | 216            | 2574          |

**Table S8.** Performance analysis of RF algorithm using KNN data imputation and XGB feature ranking.

| Number of Features | Sensitivity<br>(Recall) | Specificity | Accuracy    | Precision   | F1_Score    | Non-CKD       |                | CKD            |               |
|--------------------|-------------------------|-------------|-------------|-------------|-------------|---------------|----------------|----------------|---------------|
|                    |                         |             |             |             |             | True Negative | False Positive | False Negative | True Positive |
| 1                  | 0.96(±0.01)             | 0.66(±0.03) | 0.81(±0.01) | 0.74(±0.02) | 0.84(±0.01) | 1824          | 958            | 100            | 2690          |
| 2                  | 0.96(±0.01)             | 0.66(±0.03) | 0.81(±0.01) | 0.74(±0.02) | 0.84(±0.01) | 1824          | 958            | 100            | 2690          |
| 3                  | 0.95(±0.01)             | 0.68(±0.04) | 0.82(±0.01) | 0.75(±0.02) | 0.84(±0.01) | 1894          | 888            | 132            | 2658          |
| 4                  | 0.86(±0.09)             | 0.90(±0.02) | 0.88(±0.04) | 0.89(±0.01) | 0.88(±0.05) | 2500          | 282            | 396            | 2394          |
| 5                  | 0.93(±0.11)             | 0.90(±0.02) | 0.92(±0.05) | 0.91(±0.02) | 0.92(±0.06) | 2510          | 272            | 190            | 2600          |
| 6                  | 0.96(±0.05)             | 0.91(±0.01) | 0.93(±0.02) | 0.91(±0.01) | 0.93(±0.03) | 2525          | 257            | 119            | 2671          |
| 7                  | 0.96(±0.04)             | 0.91(±0.01) | 0.94(±0.01) | 0.91(±0.01) | 0.94(±0.02) | 2531          | 251            | 106            | 2684          |
| 8                  | 0.97(±0.03)             | 0.91(±0.02) | 0.94(±0.01) | 0.92(±0.02) | 0.94(±0.01) | 2540          | 242            | 94             | 2696          |
| 9                  | 0.97(±0.03)             | 0.92(±0.02) | 0.94(±0.02) | 0.92(±0.01) | 0.94(±0.02) | 2552          | 230            | 96             | 2694          |
| 10                 | 0.98(±0.02)             | 0.93(±0.02) | 0.95(±0.01) | 0.93(±0.02) | 0.95(±0.01) | 2579          | 203            | 60             | 2730          |
| 11                 | 0.98(±0.01)             | 0.93(±0.01) | 0.96(±0.01) | 0.94(±0.01) | 0.96(±0.01) | 2593          | 189            | 59             | 2731          |
| 12                 | 0.98(±0.01)             | 0.93(±0.02) | 0.96(±0.01) | 0.94(±0.02) | 0.96(±0.01) | 2593          | 189            | 47             | 2743          |
| 13                 | 0.98(±0.01)             | 0.93(±0.02) | 0.96(±0.01) | 0.94(±0.02) | 0.96(±0.01) | 2595          | 187            | 52             | 2738          |
| 14                 | 0.98(±0.01)             | 0.93(±0.02) | 0.96(±0.01) | 0.94(±0.02) | 0.96(±0.01) | 2596          | 186            | 49             | 2741          |
| 15                 | 0.99(±0.01)             | 0.94(±0.01) | 0.96(±0.00) | 0.94(±0.01) | 0.96(±0.00) | 2611          | 171            | 37             | 2753          |
| 16                 | 0.98(±0.01)             | 0.94(±0.02) | 0.96(±0.01) | 0.94(±0.02) | 0.96(±0.00) | 2613          | 169            | 43             | 2747          |
| 17                 | 0.99(±0.01)             | 0.94(±0.02) | 0.96(±0.01) | 0.94(±0.02) | 0.96(±0.01) | 2609          | 173            | 37             | 2753          |
| 18                 | 0.99(±0.01)             | 0.94(±0.02) | 0.96(±0.01) | 0.94(±0.02) | 0.96(±0.01) | 2613          | 169            | 36             | 2754          |
| 19                 | 0.99(±0.01)             | 0.93(±0.02) | 0.96(±0.01) | 0.94(±0.02) | 0.96(±0.01) | 2599          | 183            | 38             | 2752          |

**Table S9.** Performance analysis of XGB algorithm using KNN data imputation and Extra Tree feature ranking.

| Number of Features | Sensitivity<br>(Recall) | Specificity | Accuracy    | Precision   | F1_Score    | Non-CKD       |                | CKD            |               |
|--------------------|-------------------------|-------------|-------------|-------------|-------------|---------------|----------------|----------------|---------------|
|                    |                         |             |             |             |             | True Negative | False Positive | False Negative | True Positive |
| 1                  | 0.96(±0.01)             | 0.66(±0.03) | 0.81(±0.01) | 0.74(±0.02) | 0.84(±0.01) | 1824          | 958            | 100            | 2690          |
| 2                  | 0.96(±0.01)             | 0.66(±0.03) | 0.81(±0.01) | 0.74(±0.02) | 0.84(±0.01) | 1824          | 958            | 100            | 2690          |
| 3                  | 0.91(±0.22)             | 0.79(±0.08) | 0.85(±0.07) | 0.81(±0.03) | 0.85(±0.10) | 2185          | 597            | 250            | 2540          |
| 4                  | 0.93(±0.12)             | 0.86(±0.05) | 0.90(±0.04) | 0.87(±0.03) | 0.90(±0.05) | 2400          | 382            | 201            | 2589          |
| 5                  | 0.93(±0.10)             | 0.86(±0.03) | 0.90(±0.04) | 0.87(±0.02) | 0.90(±0.05) | 2405          | 377            | 188            | 2602          |
| 6                  | 0.95(±0.08)             | 0.87(±0.03) | 0.91(±0.04) | 0.88(±0.02) | 0.91(±0.04) | 2411          | 371            | 147            | 2643          |
| 7                  | 0.95(±0.07)             | 0.87(±0.02) | 0.91(±0.03) | 0.88(±0.02) | 0.91(±0.04) | 2419          | 363            | 141            | 2649          |
| 8                  | 0.96(±0.06)             | 0.86(±0.02) | 0.91(±0.02) | 0.88(±0.01) | 0.91(±0.03) | 2404          | 378            | 123            | 2667          |
| 9                  | 0.96(±0.04)             | 0.86(±0.03) | 0.91(±0.02) | 0.88(±0.02) | 0.92(±0.02) | 2399          | 383            | 107            | 2683          |
| 10                 | 0.97(±0.03)             | 0.87(±0.02) | 0.92(±0.01) | 0.88(±0.01) | 0.92(±0.01) | 2424          | 358            | 95             | 2695          |
| 11                 | 0.96(±0.03)             | 0.87(±0.02) | 0.92(±0.02) | 0.88(±0.01) | 0.92(±0.02) | 2409          | 373            | 98             | 2692          |
| 12                 | 0.96(±0.02)             | 0.88(±0.02) | 0.92(±0.02) | 0.89(±0.01) | 0.92(±0.02) | 2442          | 340            | 108            | 2682          |
| 13                 | 0.96(±0.03)             | 0.88(±0.01) | 0.92(±0.02) | 0.89(±0.01) | 0.92(±0.02) | 2444          | 338            | 112            | 2678          |
| 14                 | 0.96(±0.03)             | 0.88(±0.02) | 0.92(±0.02) | 0.89(±0.01) | 0.92(±0.02) | 2453          | 329            | 113            | 2677          |
| 15                 | 0.96(±0.03)             | 0.88(±0.01) | 0.92(±0.02) | 0.89(±0.01) | 0.92(±0.02) | 2453          | 329            | 119            | 2671          |
| 16                 | 0.96(±0.03)             | 0.88(±0.01) | 0.92(±0.02) | 0.89(±0.01) | 0.92(±0.02) | 2447          | 335            | 118            | 2672          |
| 17                 | 0.96(±0.03)             | 0.88(±0.02) | 0.92(±0.02) | 0.89(±0.02) | 0.92(±0.02) | 2436          | 346            | 106            | 2684          |
| 18                 | 0.96(±0.03)             | 0.88(±0.02) | 0.92(±0.02) | 0.89(±0.02) | 0.92(±0.02) | 2438          | 344            | 106            | 2684          |
| 19                 | 0.96(±0.03)             | 0.87(±0.02) | 0.92(±0.02) | 0.88(±0.02) | 0.92(±0.02) | 2432          | 350            | 101            | 2689          |

**Table S10.** Performance analysis of LightGBM algorithm using KNN data imputation and XGB feature ranking.

| Number of Features | Sensitivity<br>(Recall) | Specificity | Accuracy    | Precision   | F1_Score    | Non-CKD       |                | CKD            |               |
|--------------------|-------------------------|-------------|-------------|-------------|-------------|---------------|----------------|----------------|---------------|
|                    |                         |             |             |             |             | True Negative | False Positive | False Negative | True Positive |
| 1                  | 0.96(±0.01)             | 0.65(±0.03) | 0.81(±0.02) | 0.74(±0.02) | 0.83(±0.01) | 1822          | 961            | 104            | 2686          |
| 2                  | 0.96(±0.01)             | 0.65(±0.03) | 0.81(±0.02) | 0.74(±0.02) | 0.83(±0.01) | 1822          | 961            | 104            | 2686          |
| 3                  | 0.95(±0.01)             | 0.68(±0.04) | 0.82(±0.02) | 0.75(±0.02) | 0.84(±0.02) | 1892          | 891            | 138            | 2652          |
| 4                  | 0.91(±0.02)             | 0.82(±0.04) | 0.87(±0.02) | 0.83(±0.03) | 0.87(±0.02) | 2269          | 514            | 238            | 2552          |
| 5                  | 0.91(±0.31)             | 0.93(±0.04) | 0.92(±0.14) | 0.93(±0.02) | 0.91(±0.18) | 2577          | 206            | 263            | 2527          |
| 6                  | 0.91(±0.28)             | 0.93(±0.04) | 0.92(±0.13) | 0.93(±0.03) | 0.91(±0.16) | 2578          | 205            | 247            | 2543          |
| 7                  | 0.90(±0.35)             | 0.93(±0.06) | 0.92(±0.15) | 0.94(±0.05) | 0.91(±0.20) | 2598          | 185            | 278            | 2512          |
| 8                  | 0.91(±0.32)             | 0.94(±0.05) | 0.92(±0.14) | 0.94(±0.04) | 0.91(±0.18) | 2609          | 174            | 248            | 2542          |
| 9                  | 0.92(±0.28)             | 0.94(±0.05) | 0.93(±0.12) | 0.94(±0.04) | 0.92(±0.15) | 2614          | 169            | 212            | 2578          |
| 10                 | 0.93(±0.25)             | 0.94(±0.04) | 0.93(±0.11) | 0.94(±0.03) | 0.93(±0.13) | 2610          | 173            | 190            | 2600          |
| 11                 | 0.94(±0.20)             | 0.94(±0.04) | 0.94(±0.08) | 0.94(±0.03) | 0.94(±0.10) | 2615          | 168            | 156            | 2634          |
| 12                 | 0.96(±0.16)             | 0.94(±0.04) | 0.95(±0.06) | 0.95(±0.03) | 0.95(±0.07) | 2626          | 157            | 119            | 2671          |
| 13                 | 0.95(±0.18)             | 0.94(±0.04) | 0.95(±0.07) | 0.94(±0.03) | 0.94(±0.08) | 2619          | 164            | 135            | 2655          |
| 14                 | 0.95(±0.16)             | 0.94(±0.04) | 0.95(±0.07) | 0.95(±0.03) | 0.95(±0.08) | 2625          | 158            | 130            | 2660          |
| 15                 | 0.96(±0.16)             | 0.95(±0.03) | 0.95(±0.07) | 0.95(±0.03) | 0.95(±0.08) | 2635          | 148            | 122            | 2668          |
| 16                 | 0.96(±0.17)             | 0.95(±0.04) | 0.95(±0.07) | 0.95(±0.03) | 0.95(±0.08) | 2632          | 151            | 125            | 2665          |
| 17                 | 0.96(±0.13)             | 0.94(±0.03) | 0.95(±0.05) | 0.94(±0.02) | 0.95(±0.06) | 2619          | 164            | 98             | 2692          |
| 18                 | 0.96(±0.13)             | 0.94(±0.03) | 0.95(±0.05) | 0.95(±0.02) | 0.95(±0.06) | 2626          | 157            | 101            | 2689          |
| 19                 | 0.96(±0.14)             | 0.94(±0.04) | 0.95(±0.05) | 0.94(±0.03) | 0.95(±0.06) | 2617          | 166            | 104            | 2686          |
